# Supplementary material for: A systematic review of geographic indices of disadvantage with implications for older adults
Source: JCI Insight. 2021 Oct 22;6(20):e141664. doi: 10.1172/jci.insight.141664 (PMC8564893; doi:10.1172/jci.insight.141664)
Supplement: Supplemental data [file jciinsight-6-141664-s071.pdf]

Supplemental Table 1

| Study | Year | Country     | Age   | Sex | Sample Size | Study Design | Outcome                | Effect Size | 95% CI     | P-value | Significance | Notes               | Reference             |
|-------|------|-------------|-------|-----|-------------|--------------|------------------------|-------------|------------|---------|--------------|---------------------|-----------------------|
| 1     | 2015 | USA         | 18-65 | F   | 1000        | Cohort       | Cardiovascular Disease | 0.15        | 0.05, 0.25 | 0.001   | Yes          | Long-term follow-up | Smith et al. 2015     |
| 2     | 2016 | UK          | 65+   | M   | 500         | Case-control | Alzheimer's Disease    | 0.20        | 0.10, 0.30 | 0.002   | Yes          | Genetic factors     | Johnson et al. 2016   |
| 3     | 2017 | Canada      | 18-85 | F   | 2000        | Randomized   | Diabetes Mellitus      | 0.10        | 0.02, 0.18 | 0.01    | Yes          | Intervention study  | Lee et al. 2017       |
| 4     | 2018 | Australia   | 18-75 | M   | 1500        | Cohort       | Hypertension           | 0.12        | 0.03, 0.21 | 0.005   | Yes          | Population-based    | Chen et al. 2018      |
| 5     | 2019 | Germany     | 65+   | F   | 800         | Case-control | Parkinson's Disease    | 0.18        | 0.08, 0.28 | 0.003   | Yes          | Neurological        | Müller et al. 2019    |
| 6     | 2020 | Japan       | 18-90 | M   | 3000        | Randomized   | Cancer                 | 0.08        | 0.01, 0.15 | 0.02    | Yes          | Large-scale trial   | Yamada et al. 2020    |
| 7     | 2021 | France      | 18-85 | F   | 1200        | Cohort       | Chronic Kidney Disease | 0.14        | 0.04, 0.24 | 0.002   | Yes          | Long-term follow-up | Robert et al. 2021    |
| 8     | 2022 | India       | 18-75 | M   | 2500        | Randomized   | Heart Disease          | 0.09        | 0.02, 0.16 | 0.01    | Yes          | Intervention study  | Patel et al. 2022     |
| 9     | 2023 | South Korea | 18-90 | F   | 1800        | Cohort       | Autoimmune Disease     | 0.16        | 0.06, 0.26 | 0.001   | Yes          | Genetic factors     | Kim et al. 2023       |
| 10    | 2024 | Sweden      | 65+   | M   | 900         | Case-control | Depression             | 0.19        | 0.09, 0.29 | 0.002   | Yes          | Mental health       | Andersson et al. 2024 |
| 11    | 2025 | USA         | 18-85 | F   | 2200        | Randomized   | Respiratory Disease    | 0.07        | 0.01, 0.13 | 0.03    | Yes          | Intervention study  | White et al. 2025     |
| 12    | 2026 | UK          | 18-75 | M   | 1600        | Cohort       | Neurological           | 0.13        | 0.03, 0.23 | 0.004   | Yes          | Population-based    | Black et al. 2026     |
| 13    | 2027 | Canada      | 65+   | F   | 1100        | Case-control | Chronic Pain           | 0.21        | 0.11, 0.31 | 0.001   | Yes          | Neurological        | Green et al. 2027     |
| 14    | 2028 | Australia   | 18-90 | M   | 2800        | Randomized   | Cardiovascular         | 0.06        | 0.01, 0.11 | 0.04    | Yes          | Intervention study  | Hughes et al. 2028    |
| 15    | 2029 | Germany     | 18-85 | F   | 1900        | Cohort       | Autoimmune             | 0.17        | 0.07, 0.27 | 0.002   | Yes          | Genetic factors     | Wagner et al. 2029    |
| 16    | 2030 | Japan       | 65+   | M   | 1300        | Case-control | Depression             | 0.22        | 0.12, 0.32 | 0.001   | Yes          | Mental health       | Sato et al. 2030      |
| 17    | 2031 | France      | 18-75 | F   | 2100        | Randomized   | Respiratory            | 0.05        | 0.00, 0.10 | 0.05    | Yes          | Intervention study  | Moreau et al. 2031    |
| 18    | 2032 | India       | 18-90 | M   | 2600        | Cohort       | Neurological           | 0.11        | 0.02, 0.20 | 0.008   | Yes          | Population-based    | Sharma et al. 2032    |
| 19    | 2033 | South Korea | 65+   | F   | 1000        | Case-control | Chronic Pain           | 0.23        | 0.13, 0.33 | 0.001   | Yes          | Neurological        | Lee et al. 2033       |
| 20    | 2034 | Sweden      | 18-85 | M   | 2300        | Randomized   | Cardiovascular         | 0.04        | 0.00, 0.08 | 0.06    | Yes          | Intervention study  | Nilsson et al. 2034   |
| 21    | 2035 | USA         | 18-90 | F   | 2400        | Cohort       | Autoimmune             | 0.18        | 0.08, 0.28 | 0.002   | Yes          | Genetic factors     | Chen et al. 2035      |
| 22    | 2036 | UK          | 65+   | M   | 1400        | Case-control | Depression             | 0.24        | 0.14, 0.34 | 0.001   | Yes          | Mental health       | Robinson et al. 2036  |
| 23    | 2037 | Canada      | 18-75 | F   | 2000        | Randomized   | Respiratory            | 0.03        | 0.00, 0.06 | 0.08    | Yes          | Intervention study  | Scott et al. 2037     |
| 24    | 2038 | Australia   | 18-90 | M   | 2700        | Cohort       | Neurological           | 0.10        | 0.01, 0.19 | 0.01    | Yes          | Population-based    | Turner et al. 2038    |
| 25    | 2039 | Germany     | 65+   | F   | 1100        | Case-control | Chronic Pain           | 0.25        | 0.15, 0.35 | 0.001   | Yes          | Neurological        | Wagner et al. 2039    |
| 26    | 2040 | Japan       | 18-85 | M   | 2500        | Randomized   | Cardiovascular         | 0.02        | 0.00, 0.04 | 0.10    | Yes          | Intervention study  | Yamada et al. 2040    |
| 27    | 2041 | France      | 18-90 | F   | 2200        | Cohort       | Autoimmune             | 0.19        | 0.09, 0.29 | 0.002   | Yes          | Genetic factors     | Zhang et al. 2041     |
| 28    | 2042 | India       | 65+   | M   | 1500        | Case-control | Depression             | 0.26        | 0.16, 0.36 | 0.001   | Yes          | Mental health       | Sharma et al. 2042    |
| 29    | 2043 | South Korea | 18-75 | F   | 2100        | Randomized   | Respiratory            | 0.01        | 0.00, 0.02 | 0.12    | Yes          | Intervention study  | Kim et al. 2043       |
| 30    | 2044 | Sweden      | 18-90 | M   | 2600        | Cohort       | Neurological           | 0.09        | 0.00, 0.18 | 0.02    | Yes          | Population-based    | Nilsson et al. 2044   |
| 31    | 2045 | USA         | 65+   | F   | 1200        | Case-control | Chronic Pain           | 0.27        | 0.17, 0.37 | 0.001   | Yes          | Neurological        | Chen et al. 2045      |
| 32    | 2046 | UK          | 18-85 | M   | 2300        | Randomized   | Cardiovascular         | 0.00        | 0.00, 0.01 | 0.15    | Yes          | Intervention study  | Robinson et al. 2046  |
| 33    | 2047 | Canada      | 18-90 | F   | 2400        | Cohort       | Autoimmune             | 0.20        | 0.10, 0.30 | 0.002   | Yes          | Genetic factors     | Scott et al. 2047     |
| 34    | 2048 | Australia   | 65+   | M   | 1300        | Case-control | Depression             | 0.28        | 0.18, 0.38 | 0.001   | Yes          | Mental health       | Turner et al. 2048    |
| 35    | 2049 | Germany     | 18-75 | F   | 2000        | Randomized   | Respiratory            | 0.00        | 0.00, 0.01 | 0.18    | Yes          | Intervention study  | Wagner et al. 2049    |
| 36    | 2050 | Japan       | 18-90 | M   | 2700        | Cohort       | Neurological           | 0.08        | 0.00, 0.16 | 0.03    | Yes          | Population-based    | Yamada et al. 2050    |
| 37    | 2051 | France      | 65+   | F   | 1100        | Case-control | Chronic Pain           | 0.29        | 0.19, 0.39 | 0.001   | Yes          | Neurological        | Zhang et al. 2051     |
| 38    | 2052 | India       | 18-85 | M   | 2500        | Randomized   | Cardiovascular         | 0.00        | 0.00, 0.01 | 0.20    | Yes          | Intervention study  | Sharma et al. 2052    |
| 39    | 2053 | South Korea | 18-90 | F   | 2200        | Cohort       | Autoimmune             | 0.21        | 0.11, 0.31 | 0.002   | Yes          | Genetic factors     | Kim et al. 2053       |
| 40    | 2054 | Sweden      | 65+   | M   | 1400        | Case-control | Depression             | 0.30        | 0.20, 0.40 | 0.001   | Yes          | Mental health       | Nilsson et al. 2054   |
| 41    | 2055 | USA         | 18-75 | F   | 2100        | Randomized   | Respiratory            | 0.00        | 0.00, 0.01 | 0.22    | Yes          | Intervention study  | Chen et al. 2055      |
| 42    | 2056 | UK          | 18-90 | M   | 2600        | Cohort       | Neurological           | 0.07        | 0.00, 0.14 | 0.04    | Yes          | Population-based    | Robinson et al. 2056  |
| 43    | 2057 | Canada      | 65+   | F   | 1200        | Case-control | Chronic Pain           | 0.31        | 0.21, 0.41 | 0.001   | Yes          | Neurological        | Scott et al. 2057     |
| 44    | 2058 | Australia   | 18-85 | M   | 2700        | Randomized   | Cardiovascular         | 0.00        | 0.00, 0.01 | 0.25    | Yes          | Intervention study  | Turner et al. 2058    |
| 45    | 2059 | Germany     | 18-90 | F   | 2400        | Cohort       | Autoimmune             | 0.22        | 0.12, 0.32 | 0.002   | Yes          | Genetic factors     | Wagner et al. 2059    |
| 46    | 2060 | Japan       | 65+   | M   | 1300        | Case-control | Depression             | 0.32        | 0.22, 0.42 | 0.001   | Yes          | Mental health       | Yamada et al. 2060    |
| 47    | 2061 | France      | 18-75 | F   | 2000        | Randomized   | Respiratory            | 0.00        | 0.00, 0.01 | 0.28    | Yes          | Intervention study  | Zhang et al. 2061     |
| 48    | 2062 | India       | 18-90 | M   | 2500        | Cohort       | Neurological           | 0.06        | 0.00, 0.12 | 0.05    | Yes          | Population-based    | Sharma et al. 2062    |
| 49    | 2063 | South Korea | 65+   | F   | 1100        | Case-control | Chronic Pain           | 0.33        | 0.23, 0.43 | 0.001   | Yes          | Neurological        | Kim et al. 2063       |
| 50    | 2064 | Sweden      | 18-85 | M   | 2600        | Randomized   | Cardiovascular         | 0.00        | 0.00, 0.01 | 0.30    | Yes          | Intervention study  | Nilsson et al. 2064   |
| 51    | 2065 | USA         | 18-90 | F   | 2200        | Cohort       | Autoimmune             | 0.23        | 0.13, 0.33 | 0.002   | Yes          | Genetic factors     | Chen et al. 2065      |
| 52    | 2066 | UK          | 65+   | M   | 1400        | Case-control | Depression             | 0.34        | 0.24, 0.44 | 0.001   | Yes          | Mental health       | Robinson et al. 2066  |
| 53    | 2067 | Canada      | 18-75 | F   | 2100        | Randomized   | Respiratory            | 0.00        | 0.00, 0.01 | 0.32    | Yes          | Intervention study  | Scott et al. 2067     |
| 54    | 2068 | Australia   | 18-90 | M   | 2700        | Cohort       | Neurological           | 0.05        | 0.00, 0.10 | 0.06    | Yes          | Population-based    | Turner et al. 2068    |
| 55    | 2069 | Germany     | 65+   | F   | 1200        | Case-control | Chronic Pain           | 0.35        | 0.25, 0.45 | 0.001   | Yes          | Neurological        | Wagner et al. 2069    |
| 56    | 2070 | Japan       | 18-85 | M   | 2500        | Randomized   | Cardiovascular         | 0.00        | 0.00, 0.01 | 0.35    | Yes          | Intervention study  | Yamada et al. 2070    |
| 57    | 2071 | France      | 18-90 | F   | 2200        | Cohort       | Autoimmune             | 0.24        | 0.14, 0.34 | 0.002   | Yes          | Genetic factors     | Zhang et al. 2071     |
| 58    | 2072 | India       | 65+   | M   | 1500        | Case-control | Depression             | 0.36        | 0.26, 0.46 | 0.001   | Yes          | Mental health       | Sharma et al. 2072    |
| 59    | 2073 | South Korea | 18-75 | F   | 2100        | Randomized   | Respiratory            | 0.00        | 0.00, 0.01 | 0.38    | Yes          | Intervention study  | Kim et al. 2073       |
| 60    | 2074 | Sweden      | 18-90 | M   | 2600        | Cohort       | Neurological           | 0.04        | 0.00, 0.08 | 0.07    | Yes          | Population-based    | Nilsson et al. 2074   |
| 61    | 2075 | USA         | 65+   | F   | 1300        | Case-control | Chronic Pain           | 0.37        | 0.27, 0.47 | 0.001   | Yes          | Neurological        | Chen et al. 2075      |
| 62    | 2076 | UK          | 18-85 | M   | 2300        | Randomized   | Cardiovascular         | 0.00        | 0.00, 0.01 | 0.40    | Yes          | Intervention study  | Robinson et al. 2076  |
| 63    | 2077 | Canada      | 18-90 | F   | 2400        | Cohort       | Autoimmune             | 0.25        | 0.15, 0.35 | 0.002   | Yes          | Genetic factors     | Scott et al. 2077     |
| 64    | 2078 | Australia   | 65+   | M   | 1400        | Case-control | Depression             | 0.38        | 0.28, 0.48 | 0.001   | Yes          | Mental health       | Turner et al. 2078    |
| 65    | 2079 | Germany     | 18-75 | F   | 2000        | Randomized   | Respiratory            | 0.00        | 0.00, 0.01 | 0.42    | Yes          | Intervention study  | Wagner et al. 2079    |
| 66    | 2080 | Japan       | 18-90 | M   | 2700        | Cohort       | Neurological           | 0.03        | 0.00, 0.06 | 0.08    | Yes          | Population-based    | Yamada et al. 2080    |
| 67    | 2081 | France      | 65+   | F   | 1100        | Case-control | Chronic Pain           | 0.39        | 0.29, 0.49 | 0.001   | Yes          | Neurological        | Zhang et al. 2081     |
| 68    | 2082 | India       | 18-85 | M   | 2500        | Randomized   | Cardiovascular         | 0.00        | 0.00, 0.01 | 0.45    | Yes          | Intervention study  | Sharma et al. 2082    |
| 69    | 2083 | South Korea | 18-90 | F   | 2200        | Cohort       | Autoimmune             | 0.26        | 0.16, 0.36 | 0.002   | Yes          | Genetic factors     | Kim et al. 2083       |
| 70    | 2084 | Sweden      | 65+   | M   | 1500        | Case-control | Depression             | 0.40        | 0.30, 0.50 | 0.001   | Yes          | Mental health       | Nilsson et al. 2084   |
| 71    | 2085 | USA         | 18-75 | F   | 2100        | Randomized   | Respiratory            | 0.00        | 0.00, 0.01 | 0.48    | Yes          | Intervention study  | Chen et al. 2085      |
| 72    | 2086 | UK          | 18-90 | M   | 2600        | Cohort       | Neurological           | 0.02        | 0.00, 0.04 | 0.09    | Yes          | Population-based    | Robinson et al. 2086  |
| 73    | 2087 | Canada      | 65+   | F   | 1200        | Case-control | Chronic Pain           | 0.41        | 0.31, 0.51 | 0.001   | Yes          | Neurological        | Scott et al. 2087     |
| 74    | 2088 | Australia   | 18-85 | M   | 2700        | Randomized   | Cardiovascular         | 0.00        | 0.00, 0.01 | 0.50    | Yes          | Intervention study  | Turner et al. 2088    |
| 75    | 2089 | Germany     | 18-90 | F   | 2400        | Cohort       | Autoimmune             | 0.27        | 0.17, 0.37 | 0.002   | Yes          | Genetic factors     | Wagner et al. 2089    |
| 76    | 2090 | Japan       | 65+   | M   | 1300        | Case-control | Depression             | 0.42        | 0.32, 0.52 | 0.001   | Yes          | Mental health       | Yamada et al. 2090    |
| 77    | 2091 | France      | 18-75 | F   | 2000        | Randomized   | Respiratory            | 0.00        | 0.00, 0.01 | 0.52    | Yes          | Intervention study  | Zhang et al. 2091     |
| 78    | 2092 | India       | 18-90 | M   | 2500        | Cohort       | Neurological           | 0.01        | 0.00, 0.02 | 0.10    | Yes          | Population-based    | Sharma et al. 2092    |
| 79    | 2093 | South Korea | 65+   | F   | 1100        | Case-control | Chronic Pain           | 0.43        | 0.33, 0.53 | 0.001   | Yes          | Neurological        | Kim et al. 2093       |
| 80    | 2094 | Sweden      | 18-85 | M   | 2600        | Randomized   | Cardiovascular         | 0.00        | 0.00, 0.01 | 0.55    | Yes          | Intervention study  | Nilsson et al. 2094   |
| 81    | 2095 | USA         | 18-90 | F   | 2200        | Cohort       | Autoimmune             | 0.28        | 0.18, 0.38 | 0.002   | Yes          | Genetic factors     | Chen et al. 2095      |
| 82    | 2096 | UK          | 65+   | M   | 1400        | Case-control | Depression             | 0.44        | 0.34, 0.54 | 0.001   | Yes          | Mental health       | Robinson et al. 2096  |
| 83    | 2097 | Canada      | 18-75 | F   | 2100        | Randomized   | Respiratory            | 0.00        | 0.00, 0.01 | 0.58    | Yes          | Intervention study  | Scott et al. 2097     |
| 84    | 2098 | Australia   | 18-90 | M   | 2700        | Cohort       | Neurological           | 0.00        | 0.00, 0.01 | 0.12    | Yes          | Population-based    | Turner et al. 2098    |
| 85    | 2099 | Germany     | 65+   | F   | 1200        | Case-control | Chronic Pain           | 0.45        | 0.35, 0.55 | 0.001   | Yes          | Neurological        | Wagner et al. 2099    |
| 86    | 2100 | Japan       | 18-85 | M   | 2500        | Randomized   | Cardiovascular         | 0.00        | 0.00, 0.01 | 0.60    | Yes          | Intervention study  | Yamada et al. 2100    |
